# Supplementary material for: Icariin attenuates perfluorooctane sulfonate-induced testicular toxicity by alleviating Sertoli cell injury and downregulating the p38MAPK/MMP9 pathway
Source: Royal Society of Chemistry journal article supplement (doi:10.1039/d1fo04135e), 2022-01-01
Supplement: d1fo04135e4.pdf [file d1fo04135e4.pdf]

**Supplementary Table 1.** Antibodies used in this study

| Antibodies                                  | molecular weight (kDa) | Host Species | Vendor                 | Catalog Number | Dilution |       |
|---------------------------------------------|------------------------|--------------|------------------------|----------------|----------|-------|
|                                             |                        |              |                        |                | WB       | IF    |
| SOX9                                        | 56-65                  | Rabbit       | Millipore              | AB5535         |          | 1:300 |
| ZO-1                                        | 230                    | Rabbit       | Proteintech            | 21773-1-AP     | 1:2000   | 1:300 |
| Claudin-11                                  | 22                     | Rabbit       | Abcam                  | ab53041        | 1:2000   |       |
| Occludin                                    | 68                     | Rabbit       | Santa cruz             | sc-5562        | 1:2000   |       |
| CX43                                        | 43                     | Rabbit       | Servicebio             | GB13234-1      | 1:2000   | 1:300 |
| p-CX43                                      | 43                     | Rabbit       | Cell Signaling         | 52559S         | 1:2000   |       |
| MMP9                                        | 67                     | Rabbit       | ZEN BIO                | 10375-2-AP     | 1:2000   | 1:300 |
| p-p38MAPK                                   | 43                     | Rabbit       | ZEN BIO                | 530056         | 1:2000   | 1:300 |
| p38MAPK                                     | 43                     | Rabbit       | ZEN BIO                | WL00764        | 1:2000   | 1:300 |
| GAPDH                                       | 37                     | Rabbit       | Cell Signaling         | #5174          | 1:5000   |       |
| Alexa Fluor488 Donkey Anti-Rabbit IgG (H+L) |                        |              | Jackson ImmunoResearch | 140422         |          | 1:400 |
| Alexa Fluor594 Donkey Anti-Rabbit IgG (H+L) |                        |              | Jackson ImmunoResearch | 140019         |          | 1:400 |

Abbreviations: WB, Western blot; IF, immunofluorescence microscopy.
