# Supplementary figures and images for: Icariin attenuates perfluorooctane sulfonate-induced testicular toxicity by alleviating Sertoli cell injury and downregulating the p38MAPK/MMP9 pathway
Source: Royal Society of Chemistry journal article supplement (doi:10.1039/d1fo04135e), 2022-01-01

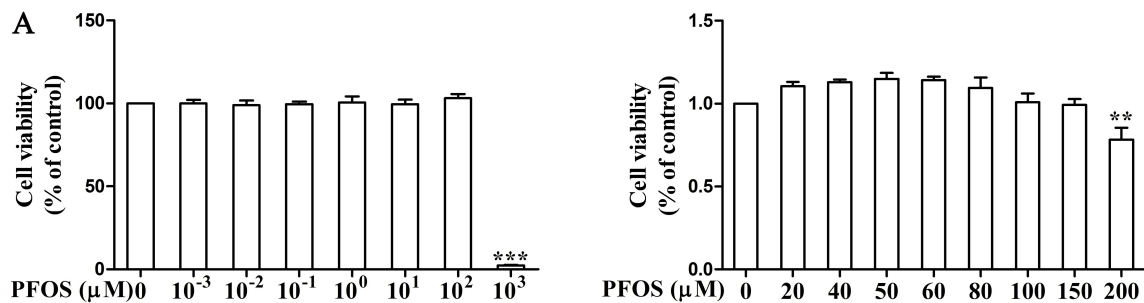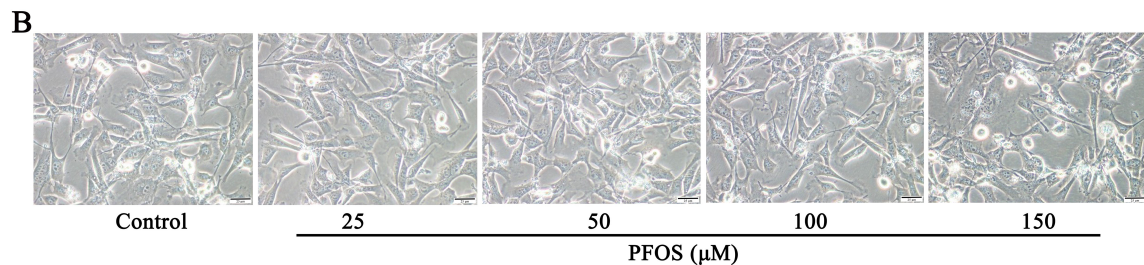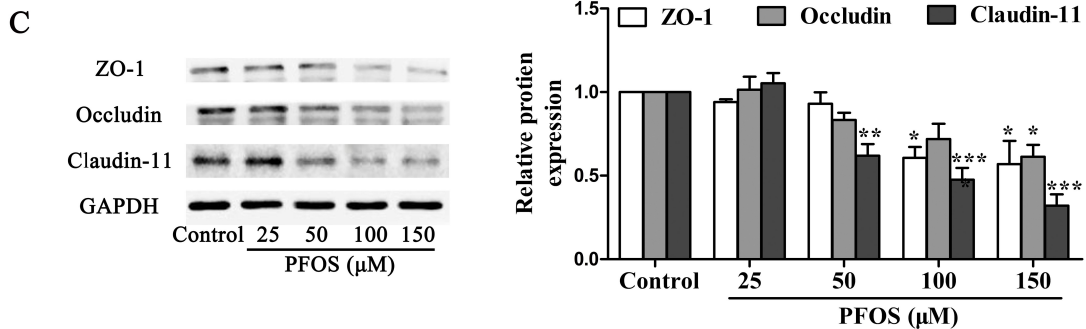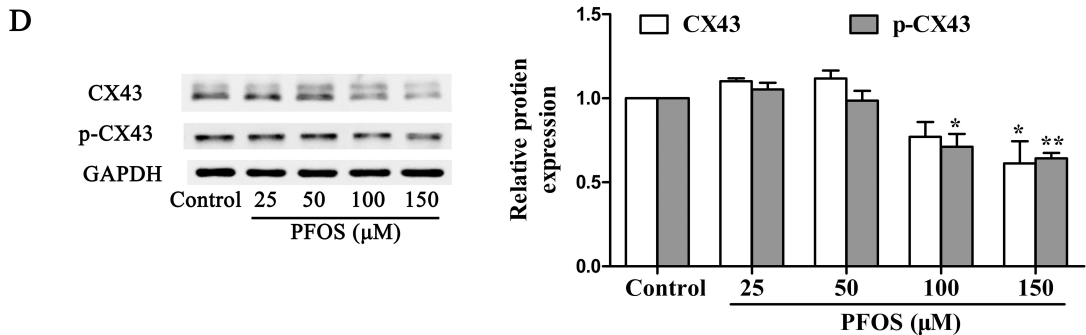

Supplement: d1fo04135e2.pdf [file d1fo04135e2.pdf]

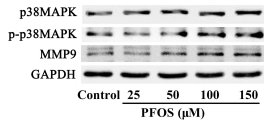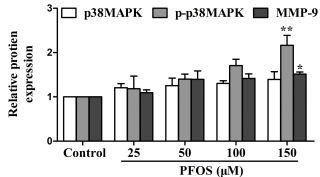

Supplement: d1fo04135e3.pdf [file d1fo04135e3.pdf]
